# Supplementary material
Source: PubMed Central journal article supplement (PMC8968463)
Supplement: NIHMS1784639-supplement-1.pdf [file NIHMS1784639-supplement-1.pdf]

**Supplementary Table 1. Baseline characteristics**

| Patient | Age | Sex | Previous Therapies (No.)                                   | Etiology                      | Fever | Splenomegaly | Hgb (g/dL) | ANC (K/uL) | Plt (K/uL) | Trig (mg/dL) | Fibr (mg/dL) | Hemophagocytosis | Ferritin (mg/dL) | Low/absent NK cell activity | sIL-2R (unit/mL) |
|---------|-----|-----|------------------------------------------------------------|-------------------------------|-------|--------------|------------|------------|------------|--------------|--------------|------------------|------------------|-----------------------------|------------------|
| 1       | 29  | F   | 1 (corticosteroids)                                        | SLE, IE, Primary              | Yes   | Yes          | 8.3        | 0          | 23         | 381          | 111          | Yes              | 1867.8           | Yes                         | 78,200           |
| 2       | 36  | M   | 1 (corticosteroids)                                        | Idiopathic                    | Yes   | Yes          | 7.5        | 1.9        | 107        | 229          | 480          | Yes              | 11,509.1         | Yes                         | 1,216            |
| 3       | 33  | F   | 2 (corticosteroids, Anakinra)                              | AOSD                          | Yes   | Yes          | 6.2        | 1.1        | 26         | 223          | 154          | Yes              | 16,500           | Yes                         | 4,242            |
| 4       | 43  | F   | 0                                                          | CMV                           | Yes   | Yes          | 7.0        | 0.8        | 68         | 311          | 90           | No               | 5,607.9          | Yes                         | 14,550           |
| 5       | 40  | F   | 0                                                          | Idiopathic                    | Yes   | Yes          | 7.8        | 2.3        | 169        | 203          | 401          | Yes              | 5,102.6          | N/A                         | 3,460            |
| 6       | 50  | M   | 0                                                          | Idiopathic                    | Yes   | Yes          | 11.0       | 8.4        | 155        | 354          | 251          | Yes              | >16,500          | N/A                         | 14,588           |
| 7*      | 62  | M   | 5 (IVIg, corticosteroids, HLH-94, tacrolimus, tocilizumab) | Idiopathic                    | Yes   | Yes          | 6.5        | 1.3        | 15         | 296          | 576          | Yes              | 14,629           | N/A                         | 4,787            |
| 8*      | 41  | F   | 3 (IVIg, corticosteroids, HLH-94)                          | Idiopathic                    | Yes   | No           | 6.1        | 1.8        | 32         | 508          | 192          | Yes              | 170,403          | N/A                         | 10,028           |
| 9*      | 21  | M   | 4 (tocilizumab, corticosteroids, HLH-94, anakinra)         | AOSD                          | Yes   | No           | 5.9        | 10.3       | 55         | 718          | 162          | Yes              | 520,761          | N/A                         | 3,467            |
| 10*     | 56  | F   | 1 (Corticosteroids)                                        | SLE; Disseminated Candidiasis | Yes   | Yes          | 7.0        | <1.0       | 18         | 314          | 187          | Yes              | 25,315           | Yes                         | N/A              |
| 11*     | 70  | F   | 0                                                          | Hodgkin Lymphoma; EBV viremia | Yes   | No           | 7.0        | 2.5        | 33         | 703          | 589          | Yes              | 31,774           | N/A                         | 12,597           |
| 12*     | 73  | M   | 0                                                          | Idiopathic                    | Yes   | Yes          | 6.0        | <0.3       | 12         | 317          | 163          | Yes              | 14,601.7         | N/A                         | 12,110           |
| 13*     | 30  | M   | 1 (HLH-94 and rituximab)                                   | CAEBV                         | Yes   | Yes          | 7.1        | 0.6        | 7          | 423          | 167          | N/A              | 363.3            | N/A                         | 13,018           |

\*Patients treated "off study".

Abbreviations: Absolute neutrophil count (ANC), Adult onset Still's disease (AOSD), Chronic active EBV viremia (CAEBV), hemoglobin (Hgb), platelets (Plt), systemic lupus erythematosus (SLE), triglycerides (trig), infective endocarditis (IE), fibrinogen (fibr), not assessed (N/A).
